# Supplementary material for: Estimating oceanic physics-driven vertical velocities in a wind-influenced coastal environment
Source: Copernicus journal article supplement (doi:10.5194/os-21-2829-2025), 2025-11-11
Supplement: Supplementary file 1 [file Table_S1.pdf › Supplementary_materials_vers2/Table_S1.pdf]

# C) Free-Fall ADCP measurements time

Table S1 - Details of interval measurements of FF-ADCP conducted at JULIO point on 06/24/2022 (time UTC).

| Cast | Descent time | Surface time |
|------|--------------|--------------|
| 1    | 08:56        | 09:02        |
| 2    | 09:02        | 09:07        |
| 3    | 09:07        | 09:12        |
| 4    | 09:12        | 09:16        |
| 5    | 09:16        | 09:21        |
| 6    | 09:21        | 09:25        |
| 7    | 09:25        | 09:30        |
| 8    | 09:30        | 09:35        |
| 9    | 09:35        | 09:40        |
| 10   | 09:40        | 09:45        |
