# Supplementary material for: Estimating oceanic physics-driven vertical velocities in a wind-influenced coastal environment
Source: Copernicus journal article supplement (doi:10.5194/os-21-2829-2025), 2025-11-11
Supplement: Supplementary file [file os-21-2829-2025-supplement-title-page.pdf › os-21-2829-2025-supplement-title-page.pdf]

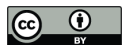

## *Supplement of*

# **Estimating oceanic physics-driven vertical velocities in a wind-influenced coastal environment**

**Maxime Arnaud et al.**

*Correspondence to:* Maxime Arnaud (maxime.arnaud@mio.osupytheas.fr)

- os-21-2829-2025-supplement-title-page.pdf
- Supplementary\_materials\_vers2
  - Figures\_S11\_S12.gif
  - Figures\_S13\_S14.gif
  - Figures\_S15\_S16.gif
  - Figures\_S1\_S2.gif
  - Figures\_S3\_S4.gif
  - Figures\_S5\_S6.gif
  - Figures\_S7\_S8.gif
  - Figures\_S9\_S10.gif
  - Table\_S1.pdf

The copyright of individual parts of the supplement might differ from the article licence.
